# Supplementary material for: Role of Direct Repeat and Stem-Loop Motifs in mtDNA Deletions: Cause or Coincidence?
Source: PubMed Central journal article supplement (PMC3329436; doi:10.1371/journal.pone.0035271), 2012-04-18
Supplement: pone.0035271.s011.pdf [file pone.0035271.s011.pdf]

## Supporting Document S1

### Non Redundant Major Arc Deletions from Individual References

#### Human mtDNA Deletions

| Number | Left Breakpoint | Right Breakpoint | Reference |
|--------|-----------------|------------------|-----------|
| 1      | 8030            | 16071            | [1]       |
| 1      | 8468            | 13580            | [2]       |
| 1      | 7478            | 11439            | [3]       |
| 2      | 11513           | 13809            |           |
| 3      | 11738           | 15571            |           |
| 4      | 6862            | 13060            |           |
| 5      | 6340            | 14004            |           |
| 6      | 9799            | 15556            |           |
| 7      | 9920            | 16070            |           |
| 8      | 6427            | 14100            |           |
| 9      | 9665            | 15182            |           |
| 10     | 8562            | 13953            |           |
| 11     | 7181            | 14560            |           |
| 12     | 9237            | 13053            |           |
| 13     | 7722            | 14109            |           |
| 14     | 7164            | 14109            |           |
| 15     | 9758            | 13748            |           |
| 16     | 10928           | 15524            |           |

|    |       |       |  |     |
|----|-------|-------|--|-----|
| 17 | 7398  | 13676 |  |     |
| 18 | 9342  | 13145 |  |     |
| 19 | 7395  | 12384 |  |     |
| 20 | 9577  | 13952 |  |     |
| 21 | 9243  | 14421 |  |     |
| 22 | 8466  | 14362 |  |     |
| 23 | 12083 | 15853 |  |     |
| 24 | 7413  | 14570 |  |     |
| 25 | 16157 | 16318 |  |     |
| 26 | 7849  | 13473 |  |     |
| 27 | 8554  | 13984 |  |     |
| 28 | 6939  | 15450 |  |     |
| 29 | 6521  | 15049 |  |     |
| 30 | 10492 | 14751 |  |     |
| 31 | 6329  | 13993 |  |     |
| 32 | 10969 | 15535 |  |     |
| 33 | 7856  | 12282 |  |     |
| 34 | 11046 | 15850 |  |     |
| 35 | 10931 | 15541 |  |     |
| 36 | 7097  | 16071 |  |     |
| 1  | 7682  | 13722 |  | [4] |
| 2  | 8469  | 13447 |  |     |
| 3  | 7468  | 15989 |  |     |

|    |       |       |     |     |
|----|-------|-------|-----|-----|
| 4  | 7817  | 16075 |     |     |
| 5  | 7663  | 13804 |     |     |
| 6  | 7398  | 13677 |     |     |
| 7  | 7957  | 13370 |     |     |
| 8  | 8131  | 13570 |     |     |
| 9  | 7853  | 13887 |     |     |
| 10 | 8299  | 13153 |     |     |
| 11 | 8137  | 14771 |     |     |
| 12 | 7912  | 9560  |     |     |
| 13 | 8568  | 12976 |     |     |
| 14 | 9570  | 10162 |     |     |
| 15 | 10183 | 13756 |     |     |
| 16 | 8525  | 13716 |     |     |
| 17 | 7728  | 13806 |     |     |
| 18 | 8030  | 14334 |     |     |
| 19 | 8464  | 13138 |     |     |
| 20 | 8441  | 14505 |     |     |
| 1  | 9436  | 15913 |     | [5] |
| 2  | 8469  | 13447 |     |     |
| 3  | 6173  | 16078 |     |     |
| 1  | 8649  | 16084 | [6] |     |
| 1  | 8036  | 13095 | [7] |     |
| 2  | 6836  | 14380 |     |     |

|    |      |       |      |
|----|------|-------|------|
| 1  | 8637 | 16084 | [8]  |
| 2  | 8470 | 13477 |      |
| 1  | 6167 | 13052 | [9]  |
| 2  | 6324 | 13989 |      |
| 3  | 6501 | 13802 |      |
| 4  | 6530 | 13831 |      |
| 5  | 6919 | 13564 |      |
| 6  | 7114 | 13992 |      |
| 7  | 7125 | 13050 |      |
| 8  | 7692 | 13983 |      |
| 9  | 7808 | 12388 |      |
| 10 | 8030 | 14563 |      |
| 11 | 8231 | 13965 |      |
| 12 | 8386 | 12820 |      |
| 13 | 8469 | 13447 |      |
| 14 | 8893 | 15503 |      |
| 15 | 9487 | 13725 |      |
| 16 | 9572 | 13938 |      |
| 17 | 9737 | 14432 |      |
| 18 | 9853 | 15019 |      |
| 1  | 8482 | 13460 | [10] |
| 2  | 8421 | 13564 |      |
| 3  | 8312 | 13667 |      |

|    |      |       |      |
|----|------|-------|------|
| 4  | 6601 | 16283 |      |
| 1  | 7539 | 15237 | [11] |
| 2  | 7933 | 15604 |      |
| 3  | 8256 | 15261 |      |
| 4  | 8580 | 15239 |      |
| 5  | 8580 | 15539 |      |
| 6  | 8640 | 15369 |      |
| 7  | 8663 | 15362 |      |
| 8  | 8825 | 15658 |      |
| 9  | 9535 | 15517 |      |
| 10 | 9538 | 15658 |      |
| 11 | 9538 | 15537 |      |
| 12 | 6128 | 15434 |      |
| 13 | 6468 | 15585 |      |
| 14 | 8576 | 16075 |      |
| 15 | 8601 | 15731 |      |
| 16 | 8645 | 15656 |      |
| 17 | 9621 | 15811 |      |
| 18 | 9624 | 15434 |      |
| 1  | 7805 | 13844 | [12] |
| 2  | 6555 | 14345 |      |
| 3  | 6437 | 14077 |      |
| 4  | 6427 | 15269 |      |

|    |      |       |      |
|----|------|-------|------|
| 5  | 8418 | 14127 |      |
| 6  | 9924 | 15194 |      |
| 7  | 6453 | 14288 |      |
| 8  | 8408 | 14118 |      |
| 9  | 8482 | 13460 |      |
| 10 | 6423 | 14344 |      |
| 11 | 6416 | 14182 |      |
| 12 | 8049 | 14115 |      |
| 13 | 6476 | 14146 |      |
| 14 | 7815 | 13581 |      |
| 15 | 7658 | 15548 |      |
| 16 | 6585 | 15144 |      |
| 17 | 6625 | 16074 |      |
| 18 | 6759 | 15865 |      |
| 19 | 8232 | 15542 |      |
| 20 | 7821 | 13760 |      |
| 21 | 7265 | 16035 |      |
| 22 | 6790 | 15918 |      |
| 23 | 7629 | 14813 |      |
| 24 | 7808 | 14799 |      |
| 25 | 8904 | 14903 |      |
| 26 | 6835 | 14380 |      |
| 1  | 8483 | 13459 | [13] |

|    |      |       |  |
|----|------|-------|--|
| 2  | 8649 | 16084 |  |
| 3  | 7960 | 13786 |  |
| 4  | 8477 | 14811 |  |
| 5  | 8440 | 16074 |  |
| 6  | 7993 | 15729 |  |
| 7  | 8035 | 16075 |  |
| 8  | 7776 | 13532 |  |
| 9  | 7842 | 13904 |  |
| 10 | 8214 | 16069 |  |
| 1  | 8470 | 13447 |  |
| 2  | 7954 | 13781 |  |
| 3  | 8470 | 14805 |  |
| 4  | 8367 | 16073 |  |
| 5  | 8433 | 16068 |  |
| 6  | 7986 | 15723 |  |
| 7  | 8027 | 16071 |  |
| 8  | 7769 | 13525 |  |

## Rhesus Monkey mtDNA Deletions

| Number | Left Breakpoint | Right Breakpoint | Reference |
|--------|-----------------|------------------|-----------|
| 1      | 6390            | 15657            | [15]      |
| 2      | 6566            | 15750            |           |
| 3      | 6517            | 15233            |           |
| 4      | 6877            | 15588            |           |
| 5      | 7474            | 15365            |           |
| 6      | 8260            | 15141            |           |
| 7      | 10209           | 15480            |           |
| 8      | 10089           | 14826            |           |
| 9      | 11025           | 15130            |           |
| 10     | 6186            | 15806            |           |
| 11     | 6114            | 15538            |           |
| 12     | 6518            | 15242            |           |
| 13     | 7534            | 15699            |           |
| 14     | 6365            | 14489            |           |
| 15     | 10133           | 15660            |           |
| 16     | 8542            | 13064            |           |
| 17     | 10172           | 14405            |           |
| 18     | 5829            | 15710            |           |
| 19     | 6534            | 15750            |           |
| 20     | 8816            | 15202            |           |
| 21     | 9064            | 14828            |           |



|    |       |       |      |
|----|-------|-------|------|
| 1  | 7576  | 15603 | [16] |
| 2  | 7366  | 15381 |      |
| 3  | 7363  | 15350 |      |
| 4  | 7595  | 15564 |      |
| 5  | 7453  | 15315 |      |
| 6  | 7329  | 15184 |      |
| 7  | 7449  | 15264 |      |
| 8  | 7990  | 15391 |      |
| 9  | 8114  | 15431 |      |
| 10 | 9090  | 14834 |      |
| 1  | 6116  | 10611 | [17] |
| 2  | 10596 | 16063 |      |
| 3  | 9081  | 14828 |      |

## Mouse mtDNA Deletions

| Number | Left Breakpoint | Right Breakpoint | Reference |
|--------|-----------------|------------------|-----------|
| 1      | 8884            | 13120            | [18]      |
| 2      | 9553            | 13279            |           |
| 3      | 9089            | 12956            |           |
| 1      | 9089            | 12956            | [19]      |
| 2      | 8010            | 15061            |           |
| 3      | 8001            | 15053            |           |
| 4      | 7992            | 15045            |           |
| 5      | 7702            | 14802            |           |
| 6      | 7860            | 14988            |           |
| 7      | 8497            | 14934            |           |
| 8      | 7665            | 14812            |           |
| 9      | 7708            | 15014            |           |
| 10     | 7664            | 14606            |           |
| 11     | 8166            | 14719            |           |
| 12     | 7751            | 14614            |           |
| 13     | 7759            | 14834            |           |
| 14     | 8020            | 14900            |           |
| 15     | 8039            | 14906            |           |
| 16     | 7734            | 14649            |           |
| 17     | 7669            | 14780            |           |
| 18     | 7723            | 12757            |           |

|    |      |       |      |
|----|------|-------|------|
| 19 | 8118 | 14798 |      |
| 20 | 8283 | 15065 |      |
| 21 | 7731 | 15023 |      |
| 22 | 7609 | 14669 |      |
| 23 | 7695 | 12895 |      |
| 24 | 7734 | 14658 |      |
| 25 | 7736 | 12779 |      |
| 26 | 7702 | 14568 |      |
| 27 | 8295 | 14862 |      |
| 28 | 7672 | 14604 |      |
| 29 | 7691 | 14912 |      |
| 30 | 7612 | 14656 |      |
| 31 | 7740 | 15006 |      |
| 1  | 7819 | 13641 | [20] |
| 1  | 7759 | 12454 | [21] |
| 1  | 8720 | 14116 | [22] |
| 1  | 7202 | 12531 | [23] |
| 1  | 9103 | 12976 | [24] |
| 2  | 9058 | 12791 |      |
| 3  | 9448 | 13103 |      |
| 4  | 8968 | 12890 |      |
| 5  | 9374 | 13071 |      |
| 6  | 8917 | 12784 |      |

|    |      |       |  |      |
|----|------|-------|--|------|
| 7  | 8932 | 12706 |  |      |
| 8  | 9170 | 12648 |  |      |
| 9  | 8904 | 12714 |  |      |
| 10 | 8897 | 12292 |  |      |
| 11 | 8982 | 12484 |  |      |
| 12 | 8901 | 12890 |  |      |
| 13 | 8956 | 12852 |  |      |
| 14 | 9111 | 12516 |  |      |
| 15 | 8878 | 12676 |  |      |
| 16 | 8948 | 12719 |  |      |
| 17 | 8953 | 12819 |  |      |
| 18 | 8967 | 13056 |  |      |
| 19 | 9020 | 12484 |  |      |
| 20 | 9067 | 13086 |  |      |
| 1  | 8883 | 13120 |  | [25] |
| 2  | 9554 | 13278 |  |      |
| 3  | 9088 | 12956 |  |      |
| 4  | 8992 | 13049 |  |      |
| 5  | 8697 | 13301 |  |      |
| 6  | 9262 | 13224 |  |      |
| 7  | 8956 | 13334 |  |      |
| 8  | 9627 | 13091 |  |      |

## Rat mtDNA Deletions

| Number | Left Breakpoint | Right Breakpoint | Reference |
|--------|-----------------|------------------|-----------|
| 1      | 7100            | 14392            | [26]      |
| 2      | 6375            | 13084            |           |
| 3      | 6883            | 14608            |           |
| 4      | 10221           | 14991            |           |
| 5      | 7166            | 14228            |           |
| 6      | 9420            | 15112            |           |
| 7      | 5530            | 14616            |           |
| 8      | 6872            | 13867            |           |
| 9      | 7268            | 14151            |           |
| 10     | 6844            | 15225            |           |
| 11     | 5935            | 14612            |           |
| 12     | 7247            | 13095            |           |
| 13     | 6336            | 13075            |           |
| 14     | 6549            | 13914            |           |
| 15     | 6033            | 14885            |           |
| 16     | 5251            | 14984            |           |
| 17     | 8149            | 14616            |           |
| 18     | 6423            | 14545            |           |
| 19     | 7398            | 15101            |           |
| 20     | 5827            | 12360            |           |
| 21     | 7170            | 14614            |           |

|    |      |       |      |
|----|------|-------|------|
| 22 | 6250 | 14399 |      |
| 23 | 7810 | 15378 |      |
| 24 | 7489 | 13122 |      |
| 25 | 8201 | 14613 |      |
| 26 | 6349 | 14219 |      |
| 27 | 8313 | 15127 |      |
| 28 | 7650 | 14466 |      |
| 29 | 7501 | 11908 |      |
| 30 | 6826 | 13410 |      |
| 1  | 5173 | 15018 |      |
| 2  | 5188 | 15109 | [27] |
| 3  | 5451 | 15109 |      |
| 4  | 5531 | 14991 |      |
| 5  | 6020 | 14911 |      |
| 6  | 6061 | 14979 |      |
| 7  | 6224 | 14911 |      |
| 8  | 5250 | 14220 |      |
| 9  | 5389 | 15265 |      |
| 10 | 5457 | 14613 |      |
| 11 | 5569 | 15080 |      |
| 12 | 6879 | 16090 |      |
| 13 | 8254 | 15129 |      |
| 14 | 5242 | 14617 |      |

|    |      |       |  |
|----|------|-------|--|
| 15 | 6345 | 15299 |  |
| 16 | 6099 | 14977 |  |
| 17 | 5534 | 14404 |  |
| 18 | 6248 | 14991 |  |
| 19 | 6316 | 14908 |  |
| 20 | 6099 | 14613 |  |
| 21 | 7170 | 15136 |  |
| 22 | 7454 | 15214 |  |
| 23 | 5250 | 12893 |  |
| 24 | 7169 | 14672 |  |
| 25 | 7878 | 15292 |  |
| 26 | 7525 | 14613 |  |
| 27 | 6514 | 13190 |  |
| 28 | 5658 | 13814 |  |
| 29 | 7552 | 14933 |  |
| 30 | 7686 | 14638 |  |
| 31 | 7382 | 14215 |  |
| 32 | 6749 | 13133 |  |
| 33 | 8631 | 13943 |  |
| 34 | 5423 | 15353 |  |
| 35 | 6562 | 13621 |  |
| 36 | 6099 | 13095 |  |
| 37 | 6091 | 12806 |  |

|    |       |       |      |
|----|-------|-------|------|
| 38 | 7837  | 13660 |      |
| 39 | 7399  | 13212 |      |
| 40 | 7689  | 12973 |      |
| 41 | 9345  | 13801 |      |
| 42 | 9394  | 13812 |      |
| 43 | 10274 | 14612 |      |
| 44 | 10307 | 14607 |      |
| 45 | 5589  | 15120 |      |
| 46 | 6117  | 13315 |      |
| 47 | 6099  | 13178 |      |
| 48 | 6099  | 13054 |      |
| 49 | 6255  | 13315 |      |
| 50 | 7493  | 13221 |      |
| 51 | 7527  | 13100 |      |
| 52 | 8098  | 14920 |      |
| 53 | 8931  | 14920 |      |
| 54 | 9662  | 13731 |      |
| 55 | 10265 | 14219 |      |
| 56 | 10427 | 14616 |      |
| 57 | 10567 | 14610 |      |
| 58 | 10896 | 13639 |      |
| 59 | 11033 | 13707 |      |
| 1  | 7599  | 15265 | [28] |



|    |      |       |  |
|----|------|-------|--|
| 2  | 7654 | 15267 |  |
| 3  | 7944 | 15265 |  |
| 4  | 5377 | 15263 |  |
| 5  | 5288 | 15266 |  |
| 6  | 5459 | 15266 |  |
| 7  | 7664 | 15142 |  |
| 8  | 7653 | 14742 |  |
| 9  | 7767 | 15422 |  |
| 10 | 7768 | 14317 |  |
| 11 | 8273 | 15224 |  |
| 12 | 8104 | 15104 |  |
| 13 | 8259 | 15296 |  |
| 14 | 5458 | 15422 |  |
| 15 | 5641 | 15289 |  |
| 16 | 5379 | 15225 |  |
| 17 | 7682 | 14590 |  |
| 18 | 7734 | 15355 |  |
| 19 | 5320 | 14983 |  |
| 20 | 8465 | 15264 |  |
| 21 | 8093 | 14395 |  |
| 22 | 8204 | 15328 |  |
| 23 | 7739 | 15265 |  |
| 24 | 7959 | 15265 |  |

|    |      |       |      |
|----|------|-------|------|
| 25 | 7594 | 15398 |      |
| 26 | 7652 | 15246 |      |
| 27 | 7644 | 15265 |      |
| 28 | 7847 | 15044 |      |
| 1  | 7398 | 15101 | [29] |
| 2  | 7650 | 14466 |      |
| 3  | 6026 | 14885 |      |
| 4  | 6350 | 14218 |      |

## References

1. Baumer A, Zhang C, Linnane AW, Nagley P (1994) Age-related human mtDNA deletions: A heterogeneous set of deletions arising at a single pair of directly repeated sequences. *Am J Hum Genet* 54: 618-630.
2. Brierley EJ, Johnson MA, Lightowlers RN, James OF, Turnbull DM (1998) Role of mitochondrial DNA mutations in human aging: implications for the central nervous system and muscle. *Ann Neurol* 43: 217-223.
3. Bua E, Johnson J, Herbst A, Delong B, McKenzie D, et al. (2006) Mitochondrial DNA-deletion mutations accumulate intracellularly to detrimental levels in aged human skeletal muscle fibers. *Am J Hum Genet* 79: 469-480.
4. Eshaghian A, Vleugels RA, Canter JA, McDonald MA, Stasko T, et al. (2006) Mitochondrial DNA deletions serve as biomarkers of aging in the skin, but are typically absent in nonmelanoma skin cancers. *J Invest Dermatol* 126: 336-344.
5. Fayet G, Jansson M, Sternberg D, Moslemi AR, Blondy P, et al. (2002) Ageing muscle: clonal expansions of mitochondrial DNA point mutations and deletions cause focal impairment of mitochondrial function. *Neuromuscul Disord* 12: 484-493.
6. Hattori K, Tanaka M, Sugiyama S, Obayashi T, Ito T, et al. (1991) Age-dependent increase in deleted mitochondrial DNA in the human heart: possible contributory factor to presbycardia. *Am Heart J* 121: 1735-1742.
7. Khrapko K, Bodyak N, Thilly WG, Van Orsouw NJ, Zhang X, et al. (1999) Cell-by-cell scanning of whole mitochondrial genomes in aged human heart reveals a significant fraction of myocytes with clonally expanded deletions. *Nucleic Acids Res* 27: 2434-2441.
8. Kim UK, Kim HS, Oh BH, Lee MM, Kim SH, et al. (2000) Analysis of mitochondrial DNA deletions in four chambers of failing human heart: hemodynamic stress, age, and disease are important factors. *Basic Res Cardiol* 95: 163-171.
9. Kravtsov Y, Kudryavtseva E, McKee AC, Geula C, Kowall NW, et al. (2006) Mitochondrial DNA deletions are abundant and cause functional impairment in aged human substantia nigra neurons. *Nat Genet* 38: 518-520.
10. Markaryan A, Nelson EG, Hinojosa R (2008) Detection of mitochondrial DNA deletions in the cochlea and its structural elements from archival human temporal bone tissue. *Mutat Res* 640: 38-45.
11. Nicholas A, Kravtsov Y, Guo X, Khrapko K (2009) On the timing and the extent of clonal expansion of mtDNA deletions: evidence from single-molecule PCR. *Exp Neurol* 218: 316-319.
12. Reeve AK, Krishnan KJ, Elson JL, Morris CM, Bender A, et al. (2008) Nature of mitochondrial DNA deletions in substantia nigra neurons. *Am J Hum Genet* 82: 228-235.
13. Wei YH (1992) Mitochondrial DNA alterations as ageing-associated molecular events. *Mutat Res* 275: 145-155.
14. Zhang C, Baumer A, Maxwell RJ, Linnane AW, Nagley P (1992) Multiple mitochondrial DNA deletions in an elderly human individual. *FEBS Lett* 297: 34-38.
15. Gokey NG, Cao Z, Pak JW, Lee D, McKiernan SH, et al. (2004) Molecular analyses of mtDNA deletion mutations in microdissected skeletal muscle fibers from aged rhesus monkeys. *Aging Cell* 3: 319-326.
16. Lee CM, Eimon P, Weindruch R, Aiken JM (1994) Direct repeat sequences are not required at the breakpoints of age-associated mitochondrial DNA deletions in rhesus monkeys. *Mech Ageing Dev* 75: 69-79.
17. McKiernan SH, Colman R, Lopez M, Mark Beasley T, Weindruch R, et al. (2009) Longitudinal analysis of early stage sarcopenia in aging rhesus monkeys. *Exp Gerontol* 44: 170-176.
18. Brossas JY, Barreau E, Courtois Y, Treton J (1994) Multiple deletions in mitochondrial DNA are present in senescent mouse brain. *Biochem Biophys Res Commun* 202: 654-659.

19. Chung S, Eimon P, Weindruch R, Aiken J (1996) Analysis of age-associated mitochondrial DNA deletion breakpoint regions from mice suggests a novel model of deletion formation. *AGE* 19: 117-128.
20. Inoue K, Ito S, Takai D, Soejima A, Shisa H, et al. (1997) Isolation of mitochondrial DNA-less mouse cell lines and their application for trapping mouse synaptosomal mitochondrial DNA with deletion mutations. *J Biol Chem* 272: 15510-15515.
21. Inoue K, Nakada K, Ogura A, Isoke K, Goto Y, et al. (2000) Generation of mice with mitochondrial dysfunction by introducing mouse mtDNA carrying a deletion into zygotes. *Nat Genet* 26: 176-181.
22. Kim J, Kim M, Kwon IS, Song E (1997) Multiple age-associated mitochondrial DNA deletions in mouse brain. *Journal of Biochemistry and Molecular Biology* 30: 33-36.
23. Nelson I, Gerasimov S, Marsac C, Lestienne P, Boursot P (1993) Sequence analysis of a deleted mitochondrial DNA molecule in heteroplasmic mice. *Mamm Genome* 4: 680-683.
24. Vermulst M, Wanagat J, Kujoth GC, Bielas JH, Rabinovitch PS, et al. (2008) DNA deletions and clonal mutations drive premature aging in mitochondrial mutator mice. *Nat Genet* 40: 392-394.
25. Wang E, Wong A, Cortopassi G (1997) The rate of mitochondrial mutagenesis is faster in mice than humans. *Mutation Research - Fundamental and Molecular Mechanisms of Mutagenesis* 377: 157-166.
26. Cao Z, Wanagat J, McKiernan SH, Aiken JM (2001) Mitochondrial DNA deletion mutations are concomitant with ragged red regions of individual, aged muscle fibers: analysis by laser-capture microdissection. *Nucleic Acids Res* 29: 4502-4508.
27. Pak JW, Vang F, Johnson C, McKenzie D, Aiken JM (2005) MtDNA point mutations are associated with deletion mutations in aged rat. *Exp Gerontol* 40: 209-218.
28. Van Tuyle GC, Gudikote JP, Hurt VR, Miller BB, Moore CA (1996) Multiple, large deletions in rat mitochondrial DNA: evidence for a major hot spot. *Mutat Res* 349: 95-107.
29. Wanagat J, Cao Z, Pathare P, Aiken JM (2001) Mitochondrial DNA deletion mutations colocalize with segmental electron transport system abnormalities, muscle fiber atrophy, fiber splitting, and oxidative damage in sarcopenia. *FASEB J* 15: 322-332.
